# Supplementary material for: Purification and characterization of immunomodulatory peptides from enzymatic hydrolysates of duck egg ovalbumin
Source: Royal Society of Chemistry journal article supplement (doi:10.1039/d0fo02674c), 2020-12-10
Supplement: d0fo02674c1.pdf [file d0fo02674c1.pdf]

## Electronic Supplementary Information

Table S1. Peptides in D1-1 from other proteins in duck egg white

| Peptides         | Source                                                                 |
|------------------|------------------------------------------------------------------------|
| KELLSDITTPK      | Ovalbumin-related protein Y                                            |
| ISSAENLKMSEAVH   | Ovalbumin-related protein Y                                            |
| SAESLKMSEAVH     | Ovalbumin-related protein Y                                            |
| LDFNFKPVQ        | Ovostatin                                                              |
| EATYNSITQNVVK    | Ovostatin                                                              |
| AEKQLGLIQ        | Pericentrin                                                            |
| EIPFVPNQGQKDTITK | Alpha-2-macroglobulin-like protein 1                                   |
| KTSGKVPAPKGES    | Fas-binding factor 1-like protein                                      |
| TKDVDLITK        | Rho-associated protein kinase 1                                        |
| DHLEASSKLVET     | Tripartite motif containing 54                                         |
| AVSFLTVL         | Serine/threonine-protein phosphatase 4 regulatory subunit 4 isoform X1 |
| LFFRIT           | Hypothetical protein Anapl_1299                                        |
| ILKTVKI          | WNT1-inducible-signaling pathway protein 3                             |

Table S2. In silico hydrolysis of peptides in D1-1 from duck egg ovalbumin by gastrointestinal enzymes (pepsin, trypsin, and chymotrypsin)

| No. | Sequence           | Results of enzyme action                   | Location of released peptides                                 |
|-----|--------------------|--------------------------------------------|---------------------------------------------------------------|
| 1   | FDKLPGF            | F - DK - L - PGF                           | [1-1],[2-3],[4-4],[5-7]                                       |
| 2   | ISSTVSLKM          | ISSTVSL - K - M                            | [1-7],[8-8],[9-9]                                             |
| 3   | ISSTVSLKMS         | ISSTVSL - K - M - S                        | [1-7],[8-8],[9-9],[10-10]                                     |
| 4   | STVSLKMSEAV        | STVSL - K - M - SEAV                       | [1-5],[6-6],[7-7],[8-11]                                      |
| 5   | ISSTVSLKMSE        | ISSTVSL - K - M - SE                       | [1-7],[8-8],[9-9],[10-11]                                     |
| 6   | TVSLKMSEAVH        | TVSL - K - M - SEAVH                       | [1-4],[5-5],[6-6],[7-11]                                      |
| 7   | ISFQTAADQAR        | ISF - QTAADQAR                             | [1-3],[4-11]                                                  |
| 8   | GISSTVSLKMSE       | GISSTVSL - K - M - SE                      | [1-8],[9-9],[10-10],[11-12]                                   |
| 9   | WTSSTMMEER         | W - TSSTM - M - EER                        | [1-1],[2-6],[7-7],[8-10]                                      |
| 10  | WVESQTNGIHK        | W - VESQTN - GIHK                          | [1-1],[2-7],[8-11]                                            |
| 11  | STVSLKMSEAVH       | STVSL - K - M - SEAVH                      | [1-5],[6-6],[7-7],[8-12]                                      |
| 12  | SISFQTAADQAR       | SISF - QTAADQAR                            | [1-4],[5-12]                                                  |
| 13  | KNILQPSSVDSQ       | K - N - IL - QPSSVDSQ                      | [1-1],[2-2],[3-4],[5-12]                                      |
| 14  | SWVESQTNGIHK       | SW - VESQTN - GIHK                         | [1-2],[3-8],[9-12]                                            |
| 15  | IDKVVHFDKLP        | IDK - VVH - F - DK - L - PG                | [1-3],[4-6],[7-7],[8-9],[10-10],[11-12]                       |
| 16  | NSWVESQTNGIHK      | N - SW - VESQTN - GIHK                     | [1-1],[2-3],[4-9],[10-13]                                     |
| 17  | ISSTVSLKMSEAVH     | ISSTVSL - K - M - SEAVH                    | [1-7],[8-8],[9-9],[10-14]                                     |
| 18  | GISSTVSLKMSEAVH    | GISSTVSL - K - M - SEAVH                   | [1-8],[9-9],[10-10],[11-15]                                   |
| 19  | KAFKDEDTQAMPFR     | K - AF - K - DEDTQAM - PF - R              | [1-1],[2-3],[4-4],[5-11],[12-13],[14-14]                      |
| 20  | TQIDKVVHFDKLPFG    | TQIDK - VVH - F - DK - L - PGF - G         | [1-5],[6-8],[9-9],[10-11],[12-12],[13-15],[16-16]             |
| 21  | SEKMKILELPFASGMM   | SEK - M - K - IL - EL - PF - ASGM - M      | [1-3],[4-4],[5-5],[6-7],[8-9],[10-11],[12-15],[16-16]         |
| 22  | SEKMKILELPFASGMMSM | SEK - M - K - IL - EL - PF - ASGM - M - SM | [1-3],[4-4],[5-5],[6-7],[8-9],[10-11],[12-15],[16-16],[17-18] |
| 23  | EWTSSTMMEERRMKVY   | EW - TSSTM - M - EER - R - M - K - VY      | [1-2],[3-7],[8-8],[9-11],[12-12],[13-13],[14-14],[15-16]      |

\*These peptides were subjected to in silico hydrolysis by gastrointestinal enzymes pepsin (PH 1.3), trypsin and chymotrypsin(A) using the BIOPEP-UWM database (<http://www.uwm.edu.pl/biochemia/index.php/pl/biopep>).

Table S3. The enzyme dosage of five proteases converted into protease activity to substrate quality

| Enzyme      | Proteolytic activity of enzyme (U/g/min)* | Enzyme dosage (U/g) |
|-------------|-------------------------------------------|---------------------|
| Neutrase    | 274157.4±8.3                              | 10966.3             |
| Protamex    | 344114.4±6.9                              | 13764.6             |
| Alcalase    | 289887.6±4.2                              | 11595.5             |
| Flavourzyme | 294507.6±7.3                              | 11780.3             |
| Papain      | 367657.5±10.3                             | 14706.3             |

Table S4 Peptides in D1-1 from duck egg ovalbumin

| No. | Charged ion (m/z) | Charge number | Molecular Mass (Da) | Sequence             | Fragment in OVA |
|-----|-------------------|---------------|---------------------|----------------------|-----------------|
| 2   | 483.2748          | 2             | 964.5351            | ISSTVSLKM            | 0.444           |
| 3   | 526.7906          | 2             | 1051.558            | ISSTVSLKMS           | 0.400           |
| 4   | 576.3074          | 2             | 1150.59             | STVSLKMSEAV          | 0.454           |
| 5   | 591.312           | 2             | 1180.601            | ISSTVSLKMSE          | 0.363           |
| 6   | 601.3198          | 2             | 1200.617            | TVSLKMSEAVH          | 0.454           |
| 8   | 619.8245          | 2             | 1237.622            | GISSTVSLKMSE         | 0.333           |
| 11  | 644.8349          | 2             | 1287.649            | STVSLKMSEAVH         | 0.417           |
| 17  | 744.8779          | 2             | 1487.765            | ISSTVSLKMSEAVH       | 0.429           |
| 18  | 773.4079          | 2             | 1544.787            | GISSTVSLKMSEAVH      | 0.400           |
| 1   | 412.2241          | 2             | 822.4276            | FDKLPG 2             | 0.571           |
| 15  | 684.3947          | 2             | 1366.761            | IDKVVHFDKLPG 1       | 0.500           |
| 20  | 900.9963          | 2             | 1799.957            | TQIDKVVHFDKLPGF 2    | 0.438           |
| 7   | 604.3112          | 2             | 1206.599            | ISFQTAADQAR 1        | 0.454           |
| 12  | 647.8276          | 2             | 1293.631            | SISFQTAADQAR 1       | 0.417           |
| 9   | 629.2692          | 2             | 1256.517            | WTSSTMMEER 1         | 0.300           |
| 23  | 688.6568          | 3             | 2062.949            | EWTSTMMEERRMKVY 2    | 0.313           |
| 10  | 637.8462          | 2             | 1273.667            | WVESQTNGIIK 1        | 0.363           |
| 14  | 681.3618          | 2             | 1360.699            | SWVESQTNGIIK 1       | 0.33            |
| 16  | 738.3831          | 2             | 1474.742            | NSWVESQTNGIIK 1      | 0.308           |
| 13  | 658.3519          | 2             | 1314.678            | KNILQPSSVDSQ         | 0.333           |
| 19  | 561.9473          | 3             | 1682.809            | KAFKDEDTQAMPFR 2     | 0.429           |
| 21  | 906.4712          | 2             | 1810.903            | SEKMKILELPFASGMM 1   | 0.562           |
| 22  | 1015.505          | 2             | 2028.976            | SEKMKILELPFASGMMSM 1 | 0.555           |

\* Nine peptide sequences selected for synthesis have been marked in red font.
